# Supplementary material for: Utilizing Twins as Controls for Non-Twin Case-Materials in Genome Wide Association Studies
Source: PubMed Central journal article supplement (PMC3858365; doi:10.1371/journal.pone.0083101), 2013-12-10
Supplement: pone.0083101.s002.pdf [file pone.0083101.s002.pdf]

# rs2033541

Plotted SNPs

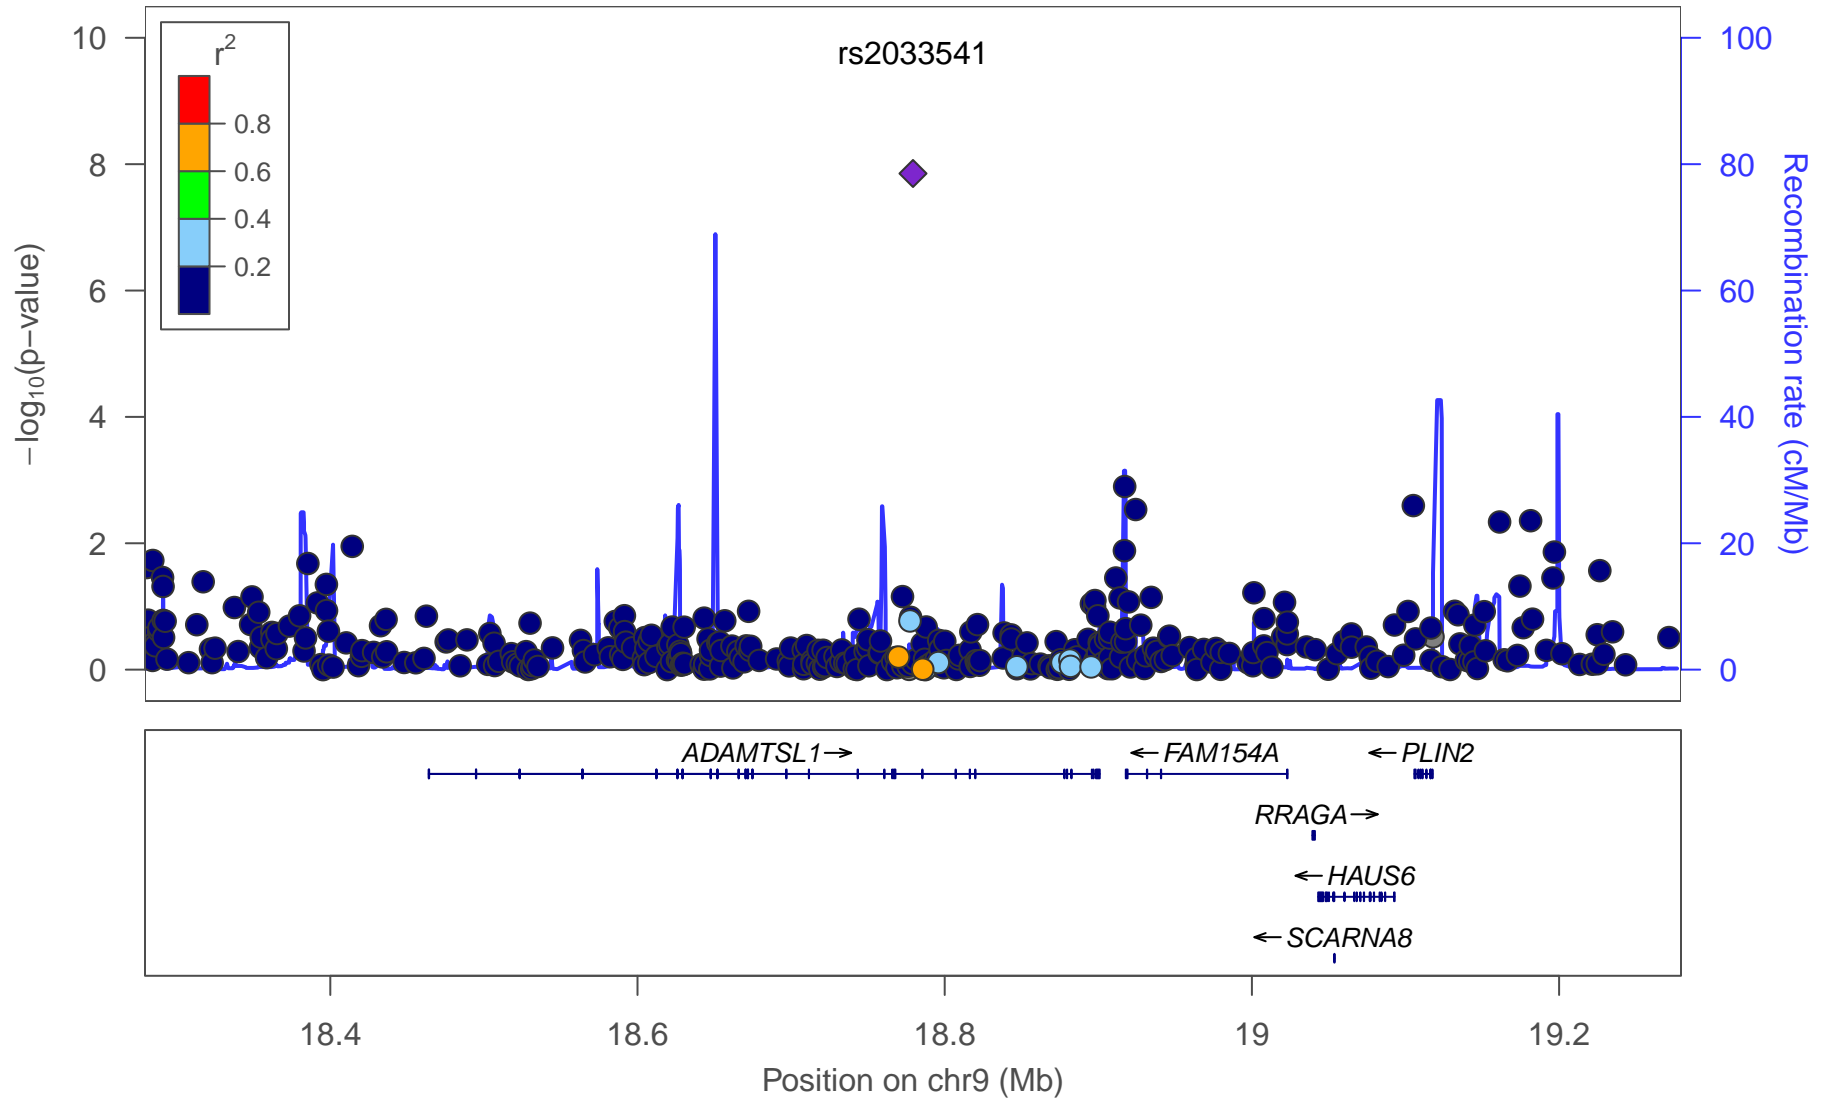

date: Mon Oct 14 10:30:11 2013

build: hg18

display range: chr9:18279352–19279352 [18279352–19279352]

hilite range: 0 – 0 [ 0 – 0 ]

reference SNP: chr9:18779352

number of SNPs plotted: 364

max P: 1.4E–8 [chr9:18779352]

min P: 10E–1 [chr9:18787256]
