# Supplementary material for: Utilizing Twins as Controls for Non-Twin Case-Materials in Genome Wide Association Studies
Source: PubMed Central journal article supplement (PMC3858365; doi:10.1371/journal.pone.0083101), 2013-12-10
Supplement: pone.0083101.s003.pdf [file pone.0083101.s003.pdf]

# rs4149283

Plotted SNPs

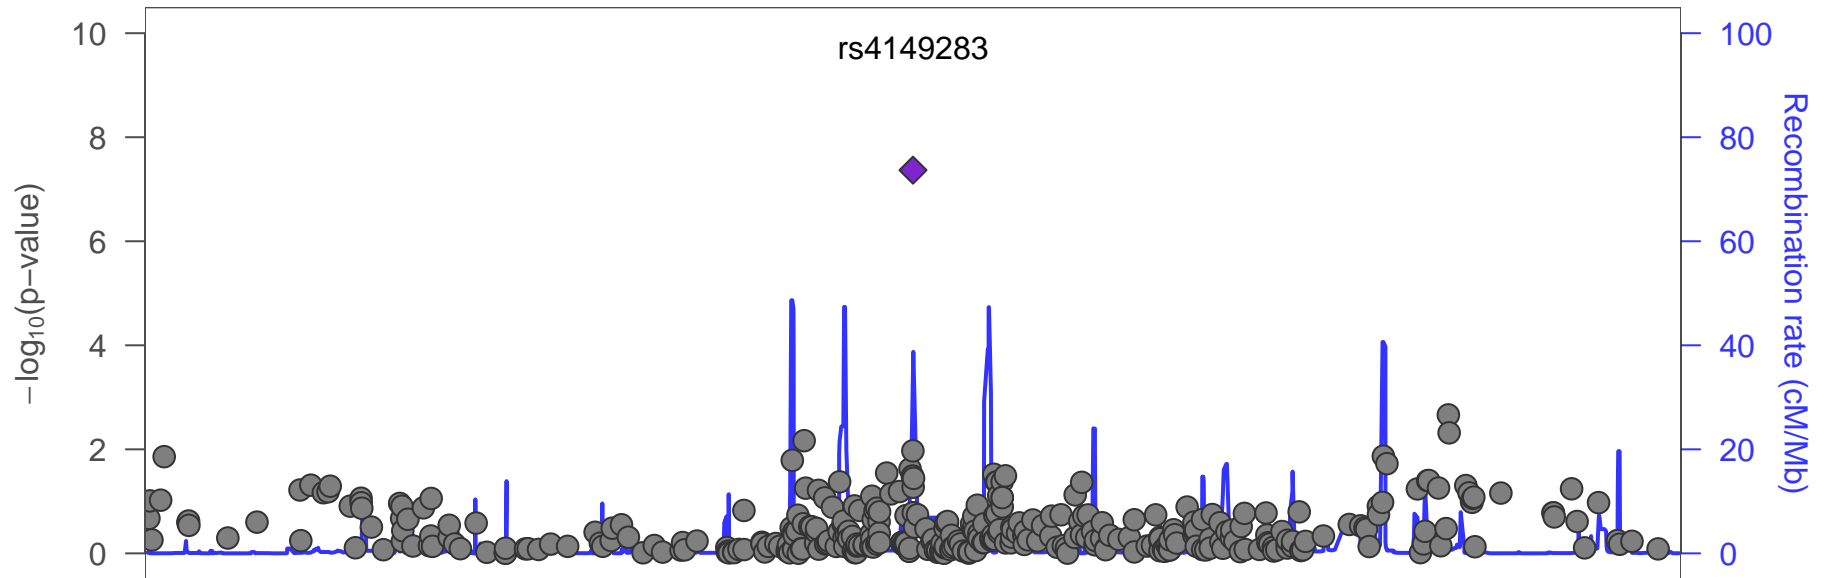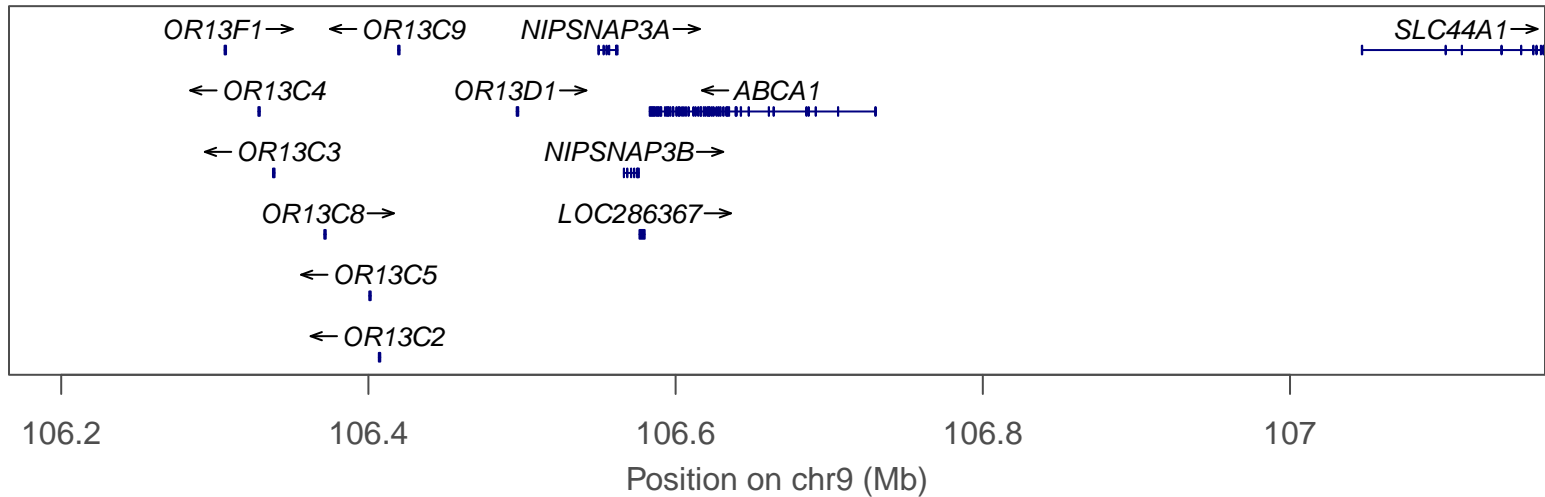

date: Mon Oct 14 10:31:28 2013

build: hg18

display range: chr9:106166010–107166010 [106166010–107166010]

hilite range: 0 – 0 [ 0 – 0 ]

reference SNP: chr9:106666010

number of SNPs plotted: 369

max P: 4.3E–8 [chr9:106666010]

min P: 9.98E–1 [chr9:106400672]

Warning: No usable LD information for reference SNP.
